# Supplementary material
Source: PubMed Central journal article supplement (PMC3783645)
Supplement: NIHMS478312-supplement-supplement_1.pdf [file NIHMS478312-supplement-supplement_1.pdf]

**Supplemental Fig. 1**

DBA/2J mice (The Jackson Laboratory, stock number 000671) were given multiple intraperitoneal injections of vehicle or STZ. Mice were treated with BEC (2.3 mg/kg/day) or vehicle via osmotic minipump for 6 weeks (*Diabetes* 60:3015-22; 2011). Following euthanasia, kidneys were immediately frozen and stored at -80°C. Samples of frozen kidney were extracted in PBS buffer and insoluble material removed by centrifugation. Nitric oxide end products (NO<sub>x</sub>) in kidney extracts were determined using a Nitrate/Nitrite Colorimetric Assay Kit (Cayman Chemical, Ann Arbor, Michigan) and normalized to total kidney protein concentration (Bio-Rad Laboratories, Hercules, CA). Results are means  $\pm$  SEM for  $n = 4-6$  mice in each group.

Supplemental Figure 1

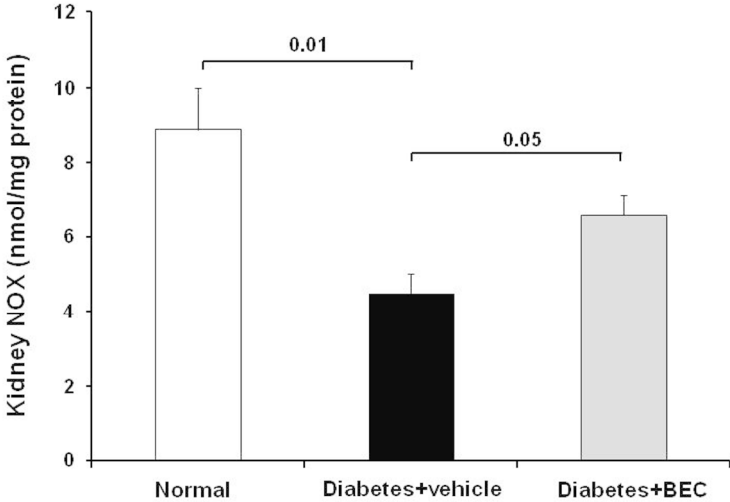

254x190mm (600 x 600 DPI)

**Supplemental Fig. 2**

Kidney tissue lysates prepared in 3M perchloric acid were subjected to UPLC-MS to measure ornithine concentration. Ornithine was eluted at retention time of 1.14 minutes. Ornithine (**A**) and isotope labeled internal ornithine standard (**B**) were demonstrated in the chromatograph.

Supplemental Figure 2

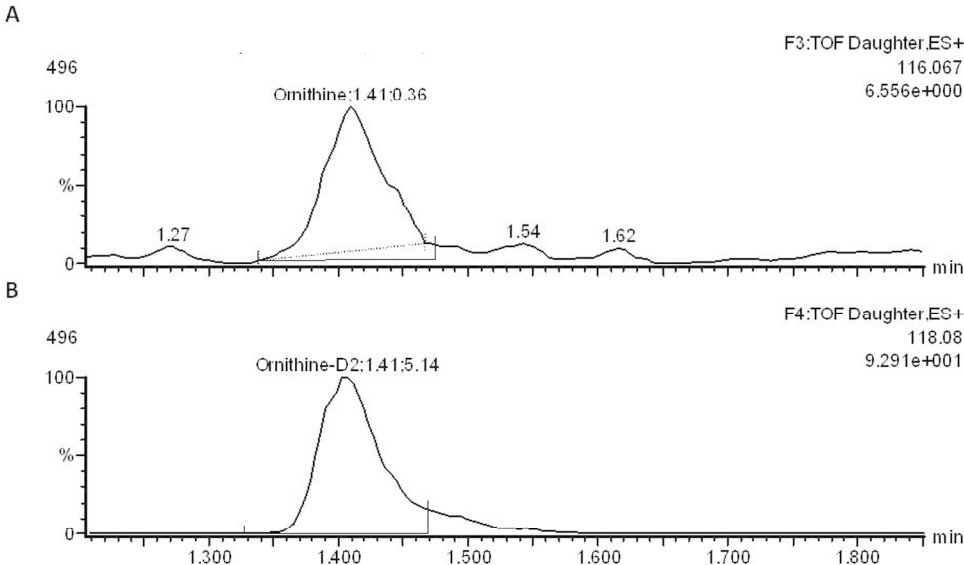

254x190mm (600 x 600 DPI)
